# Supplementary material
Source: Springer Nature journal article supplement (https://www.springermedizin.de/resource/supplementary/12889_2012_4133_MOESM1_ESM.pdf/9491364)

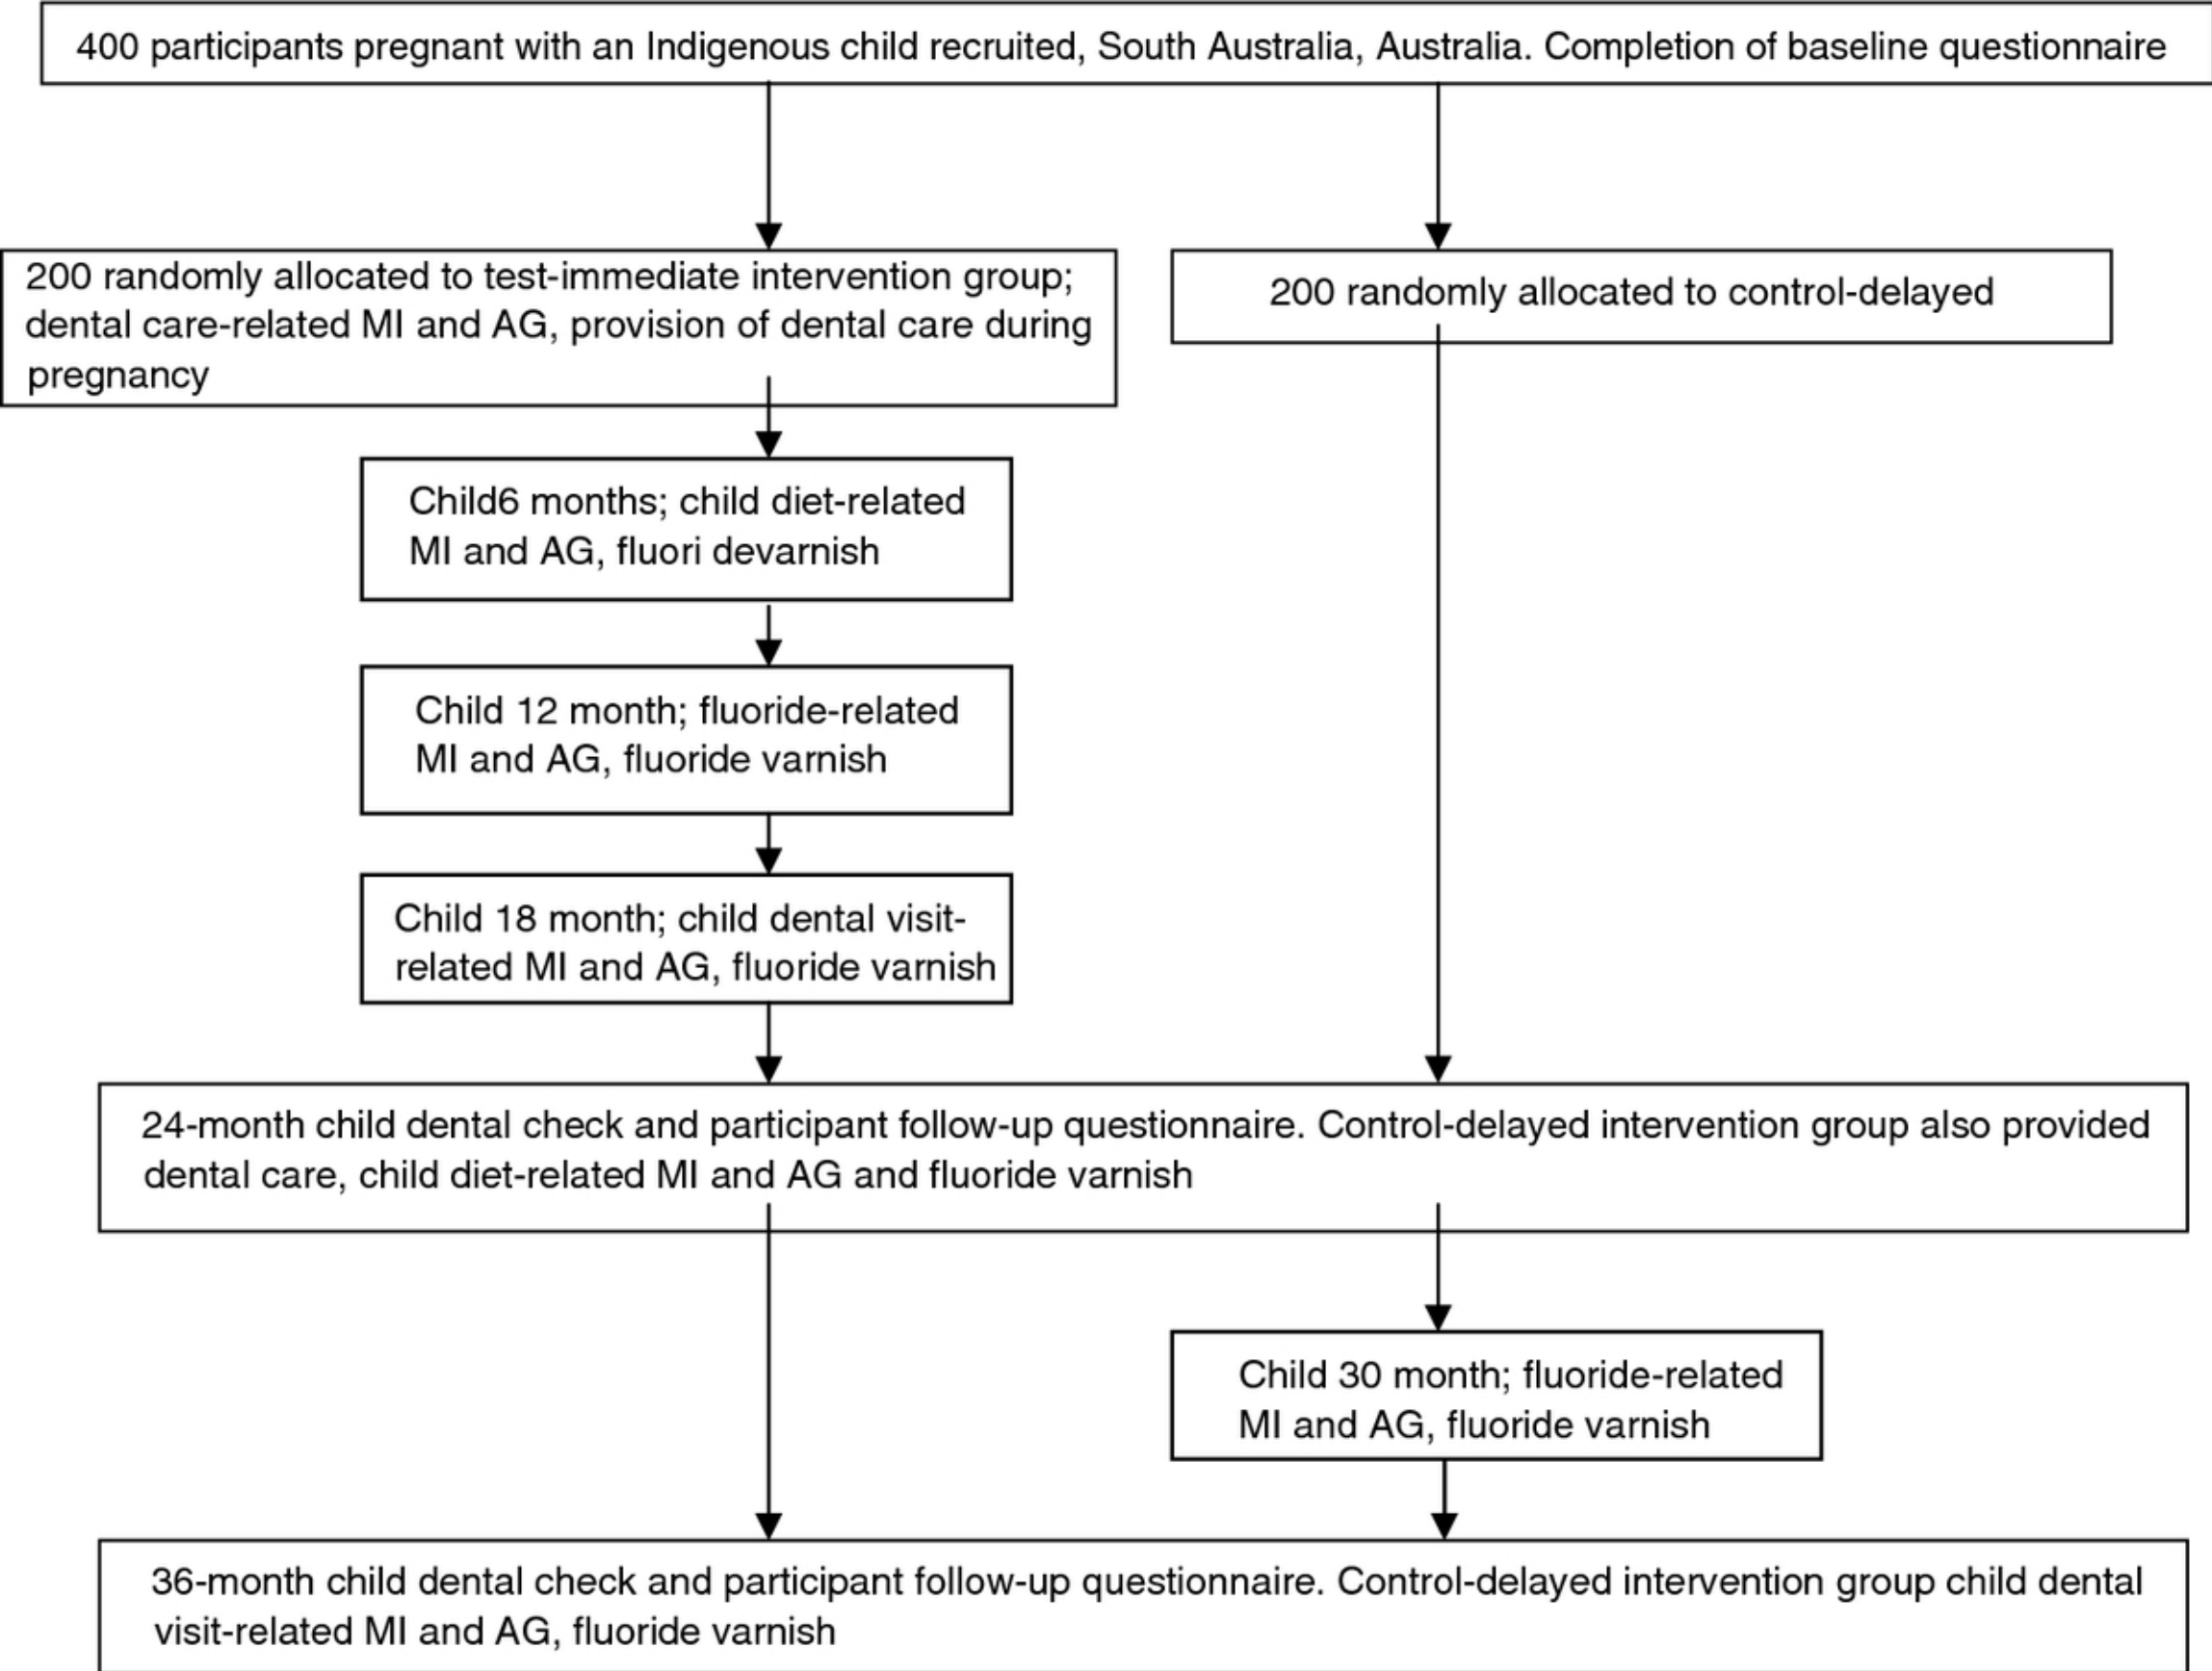

MI: Motivational interviewing

AG: Anticipatory guidance

Supplement: MOESM1 [file 9491364]
